# Supplementary material for: Clonal megakaryocyte dysplasia with normal blood values (CMD-NBV): an unique form of early myeloproliferative neoplasm
Source: Research Square preprint supplement (doi:10.21203/rs.3.rs-6622364/v1), 2025-05-16
Supplement: Supplementary file 1 [file 162174fb1a000924517d6021.docx]

**Supplemental material**

**Clonal megakaryocyte dysplasia with normal blood values (CMD-NBV): an unique form of early myeloproliferative neoplasm**

Giovanni Barosi, 1 Vittorio Rosti,1 Rita Campanelli,1 Margherita Massa,2 Carlotta Abbà,2 Adriana Carolei,1 Paolo Catarsi,1 Alessandro Inzoli,3 Lorena Pergola,4 Tiziano Barbui,5 Caterina Tatarelli,6 Maria Chiara Finazzi,7,8 Annalisa Condorelli,7 Silvia Salmoiraghi,7 Alessandro Rambaldi,7,8 Andrea Gianatti,9 Valerio De Stefano,10 Anna Gallì,11 Martina Gandossini,11 Michela Bardelli,11 Robert Peter Gale,12 Luca Malcovati.11

1. Center for the Study of Myelofibrosis, Fondazione IRCCS Policlinico San Matteo, 27100 Pavia, Italy.

2. General Medicine 2-Center for Systemic Amyloidosis and High-Complexity Diseases, Fondazione IRCCS Policlinico San Matteo, 27100 Pavia, Italy.

3. Hematology Unit, Ospedale Maggiore ASST, Crema, Italy.

4. Pathology Department, Ospedale Maggiore ASST, Crema, Italy.

5. FROM, Fondazione per la Ricerca Ospedale di Bergamo ETS, Bergamo, Italy.

6. Hematology, S.Andrea Hospital, Rome, Italy.

7. Divisione di Ematologia, ASST Papa Giovanni XXIII, Bergamo, Italy.

8. Dipartimento di Oncologia ed Emato-Oncologia, Università Degli Studi di Milano, Milan, Italy.

9. Anatomic Pathology Unit, Papa Giovanni XXIII Hospital, Bergamo, Italy.

10. Section of Hematology, Department of Radiological and Hematological Sciences, Catholic University, Rome, Italy.

11. Division of Molecular Hematology and Precision Medicine,  Fondazione Istituto di Ricovero e Cura a Carattere Scientifico Policlinico San Matteo and University of Pavia, Pavia, Italy.

12. Centre for Haematology, Department of Immunology and Inflammation, Imperial College of Science, Technology and Medicine, London, UK.

**Index:**

Supplemental Methods page 3

Supplemental Table 1 page 5

Supplemental Table 2 page 8

Supplemental Table 3 page 9

Supplemental Table 4 page 10

**Supplemental Methods**

*Genomic profiling*

Screening for myeloid cancer associated mutations was performed using oncoReveal Myeloid Panel (Pillar Biosciences, MA, USA) an amplicon-based library preparation chemistry that interrogates genes recurrently mutated in myeloid neoplasms. We focused on a core panel of 45 genes (ANKRD26 (exon 1), ASXL1 (exons 12-13), BCOR (exons 2-15), BCORL1 (exons 1-12), CALR (chr 19: g.13054521-13054710), CBL (exons 1-3, 5, 8-10, 12-13, 16), CEBPA (exon 1), CSF3R (exons 14-16), CUX1 (exons 1-5, 9-10, 12, 17, 20-21, 24), DDX41 (exons 1, 3, 5-6, 8, 10-11, 14-15), DNMT3A (exons 1-23), ETNK1 (exon 3), ETV6 (exons 1-8), EZH2 (exons 2-20), FLT3 (exons 14, 20), GATA2 (exons 3-7), GNAS (exons 8-9), HRAS (exons 2-3), IDH1 (exon 4), IDH2 (exons 4, 6), JAK2 (exons 12-15), KIT (exons 2, 8-11, 13-15, 17-18), KMT2A (exons 1-11, 27, 31, 35), KRAS (exons 2-4), MPL (exon 10), NF1 (exons 1-4, 6, 12, 30, 37-39, 41, 45, 49, 52, 58), NPM1 (exon 11), NRAS (exons 2-4), PDGFRA (exons 12, 14-15, 18), PHF6 (exons 2-10), PIGA (exons 2-6), PPM1D (exon 6), PTEN (exons 5, 7), PTPN11 (exons 3, 13), RAD21 (exons 2-14), RUNX1 (exons 2-9), SETBP1 (exon 4), SF3B1 (exons 13-16), SRSF2 (exon 1), STAG2 (exons 3-35), TET2 (exons 3-11), TP53 (exons 2-11), U2AF1 (exons 1-3, 5-6, 8), WT1 (exons 1-10), ZRSR2 (exons 1-11)). Briefly, pairs of DNA oligos targeting each region of interest were used in the first round of gene-specific PCR and the products subsequently purified via size selection. After purification, a second round of PCR adds index adaptors and P5 & P7 sequences to each library for sample tracking and sequencing. The resulting libraries were further purified and 2x250bp paired-end sequenced on an Illumina MiSeq-system platform.

*NGS Data Analysis*

The analysis of NGS data performed all the typical steps of secondary analysis from reads mapping and refinement [1, 2] to the identification of single nucleotide variants (SNVs) and insertions/deletions (Indels). The variant calling step integrated four variant calling algorithms [3, 4, 5, 6] since such approach allows identifying variants with higher sensitivity and accuracy than using any single algorithm [7, 8]. Detected variants were annotated with information about their effects on the structure or function of proteins, their frequency in populations (e.g. dbSNP, ESP6500, ExAC, gnomAD) or their presence in cancer databases (e.g. COSMIC, cBioPortal for Cancer Genomics, ClinVar). Synonymous variants, variants located outside protein coding regions and variants with VAF <2% were filtered. The remaining variants, were tagged using different criteria based on information retrieved from literature, sequence conservation and in silico prediction effect. Classification of germline variants was performed using Franklin (<https://franklin.genoox.com>) a curation tools based on the American College of Medical Genetics (ACMG) guidelines.

*References*

**[1]** Li, H., & Durbin, R. (2009). Fast and accurate short read alignment with Burrows–Wheeler transform. bioinformatics, 25(14), 1754-1760.

**[2]** McKenna, A., Hanna, M., Banks, E., Sivachenko, A., Cibulskis, K., Kernytsky, A., ... & DePristo, M. A. (2010). The Genome Analysis Toolkit: a MapReduce framework for analyzing next-generation DNA sequencing data. Genome research, 20(9), 1297-1303.

**[3]** Cibulskis, K., Lawrence, M. S., Carter, S. L., Sivachenko, A., Jaffe, D., Sougnez, C., ... & Getz, G. (2013). Sensitive detection of somatic point mutations in impure and heterogeneous cancer samples. Nature biotechnology, 31(3), 213.

**[4]** Koboldt, D. C., Zhang, Q., Larson, D. E., Shen, D., McLellan, M. D., Lin, L., ... & Wilson, R. K. (2012). VarScan 2: somatic mutation and copy number alteration discovery in cancer by exome sequencing. Genome research, 22(3), 568-576.

**[5]** Lai, Z., Markovets, A., Ahdesmaki, M., Chapman, B., Hofmann, O., McEwen, R., ... & Dry, J. R. (2016). VarDict: a novel and versatile variant caller for next-generation sequencing in cancer research. Nucleic acids research, 44(11), e108-e108.

**[6]** Fang, H., Bergmann, E. A., Arora, K., Vacic, V., Zody, M. C., Iossifov, I., ... & Ronemus, M. (2016). Indel variant analysis of short-read sequencing data with Scalpel. Nature protocols, 11(12), 2529.

**[7]** Rashid, M., Robles-Espinoza, C. D., Rust, A. G., & Adams, D. J. (2013). Cake: a bioinformatics pipeline for the integrated analysis of somatic variants in cancer genomes. Bioinformatics, 29(17), 2208-2210.

**[8]** Wang, M., Luo, W., Jones, K., Bian, X., Williams, R., Higson, H., Wu, D., Hicks, B., Yeager, M. and Zhu, B., 2020. SomaticCombiner: improving the performance of somatic variant calling based on evaluation tests and a consensus approach. *Scientific reports*, *10*(1), pp.1-16.

.

**Supplemental Table 1.** Circumstance of CMD-NBV diagnosis.

|  |  | **Precipitating event** | **Diagnostic strategy** |
| --- | --- | --- | --- |
| UPN1 | M/25 | Idiopathic mesenteric, portal, splenic vein thrombosis | Screen for MPN |
| UPN2 | M/52 | Portal cavernoma, oesophageal varices, splenomegaly | Screen for MPN |
| UPN3 | F/49 | Unexplained popliteal arterial thrombosis | Screen for MPN |
| UPN4 | M/57 | Idiopathic sagittal cerebral sinus venous thrombosis | Screen for MPN |
| UPN5 | F/44 | Recurrent idiopathic mesenteric and portal vein thromboses | Screen for MPN |
| UPN6 | M/23 | Hemoglobin = 16 g/dL, familial sclerosing cholangitis | Evaluate polycythemia |
| UPN7 | M/49 | Idiopathic portal and spleen vein thromboses | Screen for MPN |
| UPN8 | M/49 | Popliteal arterial portal vein thromboses | Screen for MPN |
| UPN9 | F/38 | Idiopathic portal vein thrombosis | Screen for MPN |
| UPN10 | M/44 | Vertebral bone alteration | Screen for MPN |
| UPN11 | F/42 | Portal cavernoma, splenomegaly | Screen for MPN |
| UPN12 | F/32 | Portal vein thrombosis | Screen for MPN |
| UPN13 | M/52 | Splenomegaly | Evaluate splenomegaly |
| UPN14 | F/46 | Portal cavernoma, splenomegaly | Screen for MPN |
| UPN15 | M/49 | Renal vein thrombosis | Screen for MPN |
| UPN16 | F/37 | Platelets = 343 x10E+9/L | Evaluate thrombocytosis |
| UPN17 | M/71 | Splenomegaly | Evaluate splenomegaly |
| UPN18 | F/46 | Portal, mesenteric vein thromboses | Screen for MPN |
| UPN19 | F/54 | Portal vein thrombosis, Budd-Chiari syndrome | Screen for MPN |
| UPN20 | M/29 | Platelets = 343 x 10E+9/L | Evaluate thrombocytosis |
| UPN21 | M/52 | Idiopathic mesenteric vein thrombosis | Screen for MPN |
| UPN22 | F/53 | Eosinophilia, WBC = 10 x E+9/L) | Evaluate eosinophilia |
| UPN23 | F/70 | Hematocrit = 47,6% | Evaluate polycythaemia |
| UPN24 | F/43 | Idiopathic spleen vein thrombosis | Screen for MPN |
| UPN25 | M/20 | Idiopathic portal vein thrombosis, Budd-Chiari syndrome | Screen for MPN |
| UPN26 | M/49 | Portal cavernoma | Screen for MPN |
| UPN27 | F/70 | Pulmonary post-embolic hypertension | Screen for MPN |
| UPN28 | M/39 | Portal vein thrombosis | Screen for MPN |
| UPN29 | F/55a | Portal cavernoma | Screen for MPN |
| UPN30 | M/75 | Splenomegaly | Evaluate splenomegaly |

**Supplemental Table 2.** European Health Interview Survey (EHIS)-defined co-morbidities present in CMD-NBV subjects at the first referral at our Center

| **Co-morbidity present** | **Subjects number (%)**  **Total =30** |
| --- | --- |
| Asthma (allergic asthma included) | 0 |
| Chronic bromchitis, chronic obstructive pulmonary disease, emphysema | 1 (3) |
| Myocardial infarction (heart attack) or chronic consequences of myocardial infarction | 2 (7) |
| Coronary heart disease or angina pectoris | 2 (7) |
| High blood pressure (hypertension) | 10 (33) |
| Stroke (cerebral haemorrhage, cerebral thrombosis) or chronic consequences of stroke | 3 (10) |
| Arthrosis (arthritis excluded) | 0 |
| Low back disorder or other chronic back defect | 0 |
| Neck disorder or other chronic neck defect | 0 |
| Diabetes | 1 (3) |
| Allergy, such as rhinitis, hay fever, eye inflammation, dermatitis, food allergy or other allergy (allergic asthma excluded) | 1 (3) |
| Cirrhosis of the liver | 0 |
| Urinary incontinence, problems in controlling the bladder | 0 |
| Kidney problems | 1 (3) |
| Depression | 1 (3) |

Note:The 15 illnesses diagnosed before or in conjunction with CMD-NBV included hypertension, coronary heart disease and angina pectoris, myocardial infarction, stroke, diabetes, asthma, chronic bronchitis, chronic obstructive pulmonary disease and emphysema, urinary incontinence, kidney problems, spinal and back pain, neck spine pain, allergies, cirrhosis of the liver, arthrosis.

**Supplemental Table 3**. Horvat defined comorbidities present in subjects with CMD-NBV. Data obtained at the first referral at our Center

|  | **Subjects number (%)**  **Total=30** |
| --- | --- |
| Cardiovascular/metabolic | 12 (40) |
| Autoimmune | 10 (33) |
| Inflammatory | 0 |
| Malignancy | 4 (13) |

**Supplemental Table 4.** Putative germline variations in subjects with CMD-NBV

| **Patient ID** | **Gene** | **Nucleotide change** | **Aminoacid change** | **Transcript ID** | **Consequence** | **VAF (%)** | **ExAC Frequency** | **ClinVar Status** | **Franklin Status** |
| --- | --- | --- | --- | --- | --- | --- | --- | --- | --- |
| UPN4 | *ASXL1* | c.3306G>T | p.Glu1102Asp | NM_015338 | missense | 52 | 0.01 | benign | polymorphism |
| UPN5 | *DNMT3A* | c.1502A>G | p.Asn501Serqì | NM_022552 | missense | 42 | 0.0003 | likely benign | likely benign |
| UPN8 | RUNX1 | c.167C>T | p.Leu56Ser | NM_001754.5 | missense | 51 | 0.01629 | benign | benign |
| UPN10 | CUX1 | c.2371G>A | p.Ala791Thr | NM_181552R | missense | 47 | 0.000017 | NR | uncertain signficance |
| UPN10 | ABL1 | c.589G>A | p.Glu197Lys | NM_005157.6 | missense | 54 | 0.00027 | uncertain significante/benign | uncertain signficance |
| UPN12 | *CSF3R* | c.2422G>A | p.Glu808Lys | NM_000760.4 | missense | 50 | 0.00622 | benign/likely benign | benign |
| UPN18 | NF1 | c.-22G>C | Null | NM_001042492 | 5’UTR variant | 35 | 0.00358 | benign/likely benign | benign |
| UPN20 | ASXL1 | c.*87A>G | Null | NM_015338 | 3’UTR variant | 49 | NR | NR | benign |
| UPN25 | TET2 | c.1018A>G | p.Ile340Val | NM_0011127208 | missense | 51 | 0.000025 | NR | likely benign |
| UPN27 | NF1 | c.6790A>T | p.Ile2264Leu | NM_001042492 | missense | 50.6 | 0.000025 | uncertain significante/likely benign | likely benign |
| UPN28 | TET2 | c.521C>A | p.Pro174His | NM_001127208 | missense | 44.6 | 0.0019 | uncertain significance/likely benign | likely benign |
| UPN29 | KIT | c.101C>T | p.Pro34Leu | NM_000222 | missense | 52 | 0.00006 | uncertain significance/likely benign | uncertain significance |

Abbreviations: VAF, variant allele frequency; NR, not reported; E
