# Supplementary material for: Clonal megakaryocyte dysplasia with normal blood values (CMD-NBV): an unique form of early myeloproliferative neoplasm
Source: Research Square preprint supplement (doi:10.21203/rs.3.rs-6622364/v1), 2025-05-16
Supplement: Supplementary file 2 [file 649002feaba3b0989363a389.docx]

**Table 5**. Major thrombotic events occurring in 30 subjects diagnosed with CMD-NBV, considering a time frame of two years before diagnosis up to the last follow-up

|  | Number of events |
| --- | --- |
| Overall thrombotic events, n | 38 |
| Arterial thrombosis, n (%) | 8 (21) |
| - In 2 years before diagnosis, n | 5 |
| - At diagnosis, n | 2 |
| - After diagnosis, n | 1 |
| Deep vein thrombosis in typical sites, n (%) | 3 (8) |
| - In 2 years before diagnosis, n | 3 |
| - At diagnosis, n | 0 |
| - After diagnosis, n | 0 |
| Venous thrombosis in atypical sites, n (%) | 27 (71) |
| - In 2 years before diagnosis, n | 6 |
| - At diagnosis, n | 16 |
| - After diagnosis, n | 5 |
