# Supplementary material for: Clonal megakaryocyte dysplasia with normal blood values (CMD-NBV): an unique form of early myeloproliferative neoplasm
Source: Research Square preprint supplement (doi:10.21203/rs.3.rs-6622364/v1), 2025-05-16
Supplement: Supplementary file 3 [file af052d52e0a6b7c2d31da4d0.docx]

**Table 1.** Baseline co-variates of subjects with CMD-NBV (n = 30). Data are shown for the whole population and according to sex

|  | **All subjects (n=30)** | | **Males**  **(n=16)** | **Females**  **(n=14)** | **p-value** |
| --- | --- | --- | --- | --- | --- |
| **Demography and anthropometry** | | | | | |
| Age, yrs, median (IQR) | 47.5  (39-53) | | 49  (30-52) | 46  (41-54) | 0.53 |
| Sex male, n (%) | 16 (53) | |  |  |  |
| BMI, kg/m2, median (IQR) | 26.1  (23.1-28.7) | | 25.9  (23.6-28.2) | 26.4  (21.7-28.7) | 0.91 |
| BMI, kg/m2, ≥ 30, n (%) | 4 (13) | | 1 (6) | 3 (21) |  |
| **Clinical-hematological co-variates** | | | | | |
| Hemoglobin, g/dL, median (IQR) | | 13.7  (12.8-15) | 14.9  (14-15.5) | 13.3  (12.7-13.5) | 0.003 |
| Mean cell volume, fl, median (IQR) | | 87.3  (81.2-89.4) | 86.7  (80.8-88.5) | 88  (85-89.9) | 0.61 |
| WBC x 10E+9/L, median (IQR) | | 6.2  (5.7-7.8) | 6.1  (5.3-7.8) | 6.7  (5.9-8.7) | 0.41 |
| WBC ≥ 8.8 x 10E+9/L, n (%) | | 5 (17) | 3 (19) | 2 (14) |  |
| WBC <4 x 10E+9/L, n(%) | | 1 (3) | 1 (6) | 0 (0) |  |
| Eosinophils percent, median (IQR) | | 3.2  (2-4.9) | 3.1  (2-3.9) | 3.4  (2.7-6.3) | 0.075 |
| Eosinophils percent >7, n (%) | | 2 (7) | 0 | 2 (14) |  |
| Basophils percent, median (IQR) | | 0.7  (0.3-1) | 0.5  (0.2-1) | 0.9  (0.5-1.1) | 0.22 |
| Basophils percent >1, n (%) | | 5 (17) | 1 (6) | 4 (28) |  |
| Monocytes x 10E+9, median (IQR) | | 486  (410-556) | 496  (409-548) | 463  (411-743) | 0.98 |
| Monocytes > 700 x 10E+9, n (%) | | 5 (17) | 2 (12) | 3 (21) |  |
| Platelets x10E+9/L, median (IQR) | | 274  (205-371) | 209  (192-278) | 356  (277-396) | 0.003 |
| Platelets > 390 x 10E+9/L, n (%) | | 6 (20) | 2 (12) | 4 (28) |  |
| Platelets < 150 x 10E+9/L, n (%) | | 3 (10) | 3 (19) | 0 (0) |  |
| Spleen size, cm E+2, median (IQR) | | 90  (90-110) | 90  (90-120) | 90  (90-90) | 0.36 |
| Spleen size > 90 cm2, n (%) | | 9 (30) | 6 (37) | 3 (21) |  |
| Plasma LDH, x ULN, median (IQR) | | 0.86  (0.78-1.00) | 0.78  (0.66-0.90) | 0.93  (0.83-1.17) | 0.007 |
| Serum cholesterol, mg/dL, median (IQR) | | 190  (146-217) | 178  (133-200) | 194  (179-218) | 0.21 |
| Blood CD34-positive cells x 10E+6, median (IQR) | | 2.37  (1.60-4.31) | 2.19  (1.36-4.72) | 2.56  (1.63-3.39) | 0.85 |
| **Molecular co-variates** | | | | | |
| *JAK2*V617F, n (%) | | 21 (70) | 10 (62.5) | 11 (78.6) | 0.33 |
| *JAK2*V617F allele frequency, median (IQR) | | 7.8  (5.2-17.9) | 5.9  (3.7-10) | 14.2  (6.8-19.5) | 0.11 |
| *CALR* mutation, n (%) | | 0 | 0 | 0 |  |
| MPL mutation, n (%) | | 0 | 0 | 0 |  |
| Triple negative, n (%) | | 9 (30) | 6 (37.5) | 3 (21.4) | 0.33 |

BMI: Body mass index; IQR: Interquartile range. ULN: upper limit of normal.

By dividing subjects according to sex, males had significantly higher hemoglobin concentrations than had females. By contrast, males had lower platelet count and LDH plasma concentration than females
