# Supplementary material for: Clonal megakaryocyte dysplasia with normal blood values (CMD-NBV): an unique form of early myeloproliferative neoplasm
Source: Research Square preprint supplement (doi:10.21203/rs.3.rs-6622364/v1), 2025-05-16
Supplement: Supplementary file 4 [file b2b8dc5953a31f2909ec7442.docx]

**Table 4.** Genetic and molecular profile of the 30 subjects diagnosed with CMD-NBV. Data were obtained at diagnosis

| Case # | Sex/age | Driver mutation (VAF%) | NGS-somatic variants (VAF%) | NGS- putative germline variants (VAF%) | Cytogenetics |
| --- | --- | --- | --- | --- | --- |
| UPN1 | M/25 yrs | *JAK2*V617F (21) | Neg | Neg |  |
| UPN2 | M/52 yrs | *JAK2*V617F (10) | ND | ND | XY |
| UPN3 | F/49 yrs | *JAK2*V617F (5) | Neg | Neg |  |
| UPN4 | M/57 yrs | *JAK2*V617F (5.2) | Neg | *ASXL1* (c.3306G>T) (p.Glu1102Asp) (52.6) |  |
| UPN5 | F/44 yrs | *JAK2*V617F (7.7) | Neg | *DNMT3A* (c.1502A>G) (p.Asn501Ser) (42) |  |
| UPN6 | M/23 yrs | TN | ND | ND |  |
| UPN7 | M/49 yrs | *JAK2*V617F (5.9) | Neg | Neg |  |
| UPN8 | M/49 yrs | TN | Neg | *RUNX1* (c.167C>T) (p.Leu56Ser) (51) | XY |
| UPN9 | F/38 yrs | *JAK2*V617F (ND) | *TET2* (c.4585C>T) (p.Gln1529*) (2.7) | Neg | XX |
| UPN10 | M/44 yrs | TN | Neg | *ABL1* (c.589G>A) (p.Glu197Lys) (54)  *CUX1* (c.2371G>A) (p.Ala791Thr) (47) |  |
| UPN11 | F/42 yrs | *JAK2*V617F (33) | Neg | Neg | XX |
| UPN12 | F/32 yrs | TN | Neg | *CSF3R* (c.2422G>A) (Glu808Lys) (50) | XX |
| UPN13 | M/52 yrs | *JAK2*V617F (16) | ND | ND |  |
| UPN14 | F/46 yrs | *JAK2*V617F (ND) | *ASXL1* (c.2077C>T) (p.Arg693*) (3.8)  *ASXL1* (c.1900_1922 del) (p.Glu635fs) (41) | Neg |  |
| UPN15 | M/49 yrs | *JAK2*V617F (0.65) | *TET2* (c.4045-1G>A) (null) (3.9) | Neg |  |
| UPN16 | 37/F yrs | TN | Neg | Neg |  |
| UPN17 | M/71 yrs | TN | Neg | Neg |  |
| UPN18 | F/46 yrs | *JAK2*V617F (19) | Neg | *NF1* (c.-22G>C) (null) (35) |  |
| UPN19 | F/54 yrs | *JAK2*V617F (ND) | ND | ND | XX |
| UPN20 | M/29 yrs | *JAK2*V617F (7.8) | Neg | *ASXL1* (c.*87A>G) (null) (49) | XY |
| UPN21 | M/52 yrs | *JAK2*V617F (0.19) | Neg | Neg |  |
| UPN22 | F/53 yrs | TN | Neg | Neg |  |
| UPN23 | F/70 yrs | *JAK2*V617F (5) | *DNMT3A* (c.2320G>T) (p.Glu774*) (8)  *TET2* (c.4791del) (p.Tyr1598Ilefs*12) (4)  *SRSF2* (c.161C>T) (p.Ser54Phe) (3) | Neg | XX |
| UPN24 | F/43 yrs | *JAK2*V617F (5) | Neg | Neg |  |
| UPN25 | M/20 yrs | TN | Neg | *TET2* (c.1018A>G) (p.Ile340Val) (50.7) |  |
| UPN26 | M/49 yrs | TN | ND | ND |  |
| UPN27 | F/70 | *JAK2*V617F (17.9) | *DNMT3A* (c.1656 delC) (p.Asn552fs) (2.5) | *NF1* (c.6790A>T) (Ile2264Leu) (50.6) |  |
| UPN28 | M/39 | *JAK2*V617F (3.7) | Neg | *TET2* (c.521C>A) (p.Pro174His)(44) |  |
| UPN29 | F/55 | *JAK2*V617F (12) | *DNMT3A* (c.1490G>A) (p.Cys4977Tyr) (2.8)  *TET2* (c.4393C>T) (p.Arg1465*) (2.3) | *KIT* (c.101C>T) (p.Pro34Leu) (52) |  |
| UPN30 | M/75 | *JAK2*V617F (ND) | ND | ND | Trisomy 9/del Y |

VAF: variation allele frequency; TN: triple negative; ND: not determined; NGS: next generation sequencing
