# Supplementary material for: Clonal megakaryocyte dysplasia with normal blood values (CMD-NBV): an unique form of early myeloproliferative neoplasm
Source: Research Square preprint supplement (doi:10.21203/rs.3.rs-6622364/v1), 2025-05-16
Supplement: Supplementary file 5 [file df40b1c30de2421a624f0aa4.docx]

**Table 3.** Detailed analysis of the bone marrow features of 30 subjects with CMD-NBV at diagnosis

| **Quantitative variables** | | | |
| --- | --- | --- | --- |
|  | Reduced  n (%) | Normal  n (%) | Increased  n (%) |
| Cellularity | 3 (10) | 9 (30) | 18 (60) |
| Erythropoiesis | 2 (7) | 11 (37) | 17 (57) |
| Granulopoiesis | 2 (7) | 12 (40) | 16 (53) |
| Megakaryopoiesis | 0 | 0 | 30 (100) |
| **Qualitative variables** | | | |
|  | Present, n subjects (%) | | |
| Megakaryocyte clusters | 22 (73) | | |
| - Loose | 19 (63) | | |
| - Dense | 3 (10) | | |
| Megakaryocyte nuclei | | | |
| - Hyper-lobulated | 2 (7) | | |
| - Bulbous | 14 (47) | | |
| Small megakaryocytes | *6 (20)* | | |
| Fibrosis | | | |
| - Grade 0 | 20 (67) | | |
| - Grade 1 | 10 (33) | | |
| - Grade 2 | 0 | | |
| - Grade 3 | 0 | | |
