# Supplementary material for: Clonal megakaryocyte dysplasia with normal blood values (CMD-NBV): an unique form of early myeloproliferative neoplasm
Source: Research Square preprint supplement (doi:10.21203/rs.3.rs-6622364/v1), 2025-05-16
Supplement: Supplementary file 6 [file e9d7d0df34319fbbf3b34534.docx]

**Table 2.** Co-morbidities of subjects with CMD-NBV according to the Charlson co-morbidity index. Data were obtained at the first referral at our Center

| **Co-moribidities, n (%)** | **Subjects number (%)**  **Total = 30** |
| --- | --- |
| Acute myocardial infarction | 2 (7) |
| Solid neoplasia  - Localized  - Metastatic | 4 (13)  2 (7)  2 (7) |
| Diabetes mellitus  - Uncomplicated  - Complicated | 1 (3)  1 (3)  0 |
| Transient ischemic attack/stroke | 4 (13) |
| Chronic obstructive pulmonary disease | 1 (3) |
| Peptic ulcer disease | 0 |
| Peripheral vascular disease | 3 (10) |
| Liver disease  - Mild  - Moderate-severe | 2 (7)  1 (3)  1 (3) |
| Connective tissue disease | 1 (3) |
| Congestive heart failure | 1 (3) |
| Chronic cognitive deficit | 0 |
| Hemiplegia | 0 |
| Lymphoma | 1 (3) |
| Leukemia | 0 |
| Acquired immune deficiency syndrome | 0 |
